# Supplementary material
Source: Springer Nature journal article supplement (https://www.springermedizin.de/resource/supplementary/12958_2013_1154_MOESM1_ESM.pdf/9566926)
Supplement: MOESM1 [file 9566926]

## Enrollment

Assessed for eligibility ( $n = 118$ )

Excluded ( $n = 18$ )

- Not meeting inclusion criteria ( $n = 18$ )
- Declined to participate ( $n = 0$ )
- Other reasons ( $n = 0$ )

Randomized ( $n = 100$ )

## Allocation

Allocated to intervention OCP ( $n = 50$ )

- Received allocated intervention ( $n = 50$ )
- Did not receive allocated intervention ( $n = 0$ )

Allocated to intervention  $E_2$  ( $n = 50$ )

- Received allocated intervention ( $n = 50$ )
- Did not receive allocated intervention ( $n = 0$ )

## Follow-Up

Lost to follow-up ( $n = 0$ )

Discontinued intervention

- Stimulation cancelled due to low response ( $n = 3$ )
- No ET (no embryos available on day 3) ( $n = 4$ )

Patients with ET ( $n = 43$ )

Lost to follow-up ( $n = 0$ )

Discontinued intervention

- Stimulation cancelled due to low response ( $n = 2$ )
- No ET (no embryos available on day 3) ( $n = 7$ )

Patients with ET ( $n = 41$ )

## Analysis

Analysed ( $n = 50$ , under the ITT principle)

- Excluded from analysis ( $n = 0$ )

Analysed ( $n = 50$ , under the ITT principle)

- Excluded from analysis ( $n = 0$ )
